# Supplementary material for: The Use of Nitrosative Stress Molecules as Potential Diagnostic Biomarkers in Multiple Sclerosis
Source: MDPI journal article supplement (doi:10.3390/ijms25020787), 2024-01-08
Supplement: s1 [file s1]

| Pseudonym     | CSF leukocytes (/μl) | CSF albumin ratio | BCSFBD | IgG synthesis | IgG synthesis (%) | IgG ratio (x1/1000) | IgA synthesis | IgA synthesis (%) | IgA ratio | IgM synthesis | IgM synthesis (%) | IgM ratio | CSF OCBs | MRZ  |
|---------------|----------------------|-------------------|--------|---------------|-------------------|---------------------|---------------|-------------------|-----------|---------------|-------------------|-----------|----------|------|
| NIT-7990854   | <2                   | 7.0               | yes    | no            | 0.0               | 3.4                 | no            | 0.0               | 2.7       | no            | 0.0               | 0.7       | no       | neg. |
| GEN-K-5434398 | 4.0                  | 3.4               | no     | no            | 0.0               | 1.5                 | no            | 0.0               | 0.6       | no            | 0.0               | 0.2       | no       | neg. |
| GEN-K-7897038 | <2                   | 5.5               | no     | no            | 0.0               | 2.5                 | no            | 0.0               | 1.3       | no            | 0.0               | 0.2       | no       | n/a  |
| GEN-K-7250304 | n/a                  | n/a               | n/a    | n/a           | n/a               | n/a                 | n/a           | n/a               | n/a       | n/a           | n/a               | n/a       | n/a      | n/a  |
| GEN-K-7895979 | <2                   | 3.5               | no     | no            | 0.0               | 1.7                 | no            | 0.0               | 0.8       | no            | 0.0               | 0.1       | no       | n/a  |
| GEN-K-7901346 | <2.0                 | 3.1               | no     | no            | 0.0               | 1.5                 | no            | 0.0               | 0.7       | no            | 0.0               | 0.6       | no       | neg. |
| GEN-K-3717612 | 3.0                  | 7.7               | yes    | no            | 0.0               | 4.3                 | no            | 0.0               | 2.8       | no            | 0.0               | 0.4       | no       | neg. |
| NIT-5501313   | <2.0                 | 6.1               | no     | no            | 0.0               | 2.8                 | no            | 0.0               | 1.4       | no            | 0.0               | 0.2       | no       | neg. |
| NIT-7895802   | <2.0                 | 3.3               | no     | no            | 0.0               | 1.4                 | no            | 0.0               | 0.7       | no            | 0.0               | 0.2       | no       | neg. |
| NIT-7799868   | 2.0                  | 2.9               | no     | no            | 0.0               | 1.3                 | no            | 0.0               | 0.6       | no            | 0.0               | 0.2       | no       | neg. |
| NIT-6673248   | <2.0                 | 4.9               | no     | no            | 0.0               | 2.5                 | no            | 0.0               | 1.6       | no            | 0.0               | 0.3       | no       | neg. |
| NIT-7818138   | <2.0                 | 3.1               | no     | no            | 0.0               | 1.6                 | no            | 0.0               | 0.8       | no            | 0.0               | 0.3       | no       | neg. |
| NIT-3253011   | 2.0                  | 3.6               | no     | no            | 0.0               | 1.5                 | no            | 0.0               | 1.0       | no            | 0.0               | 0.2       | no       | neg. |
| NIT-8003463   | 3.0                  | n/a               | no     | n/a           | n/a               | n/a                 | n/a           | n/a               | n/a       | n/a           | n/a               | n/a       | no       | neg. |
| NIT-6174948   | <2.0                 | 3.5               | no     | no            | 0.0               | 1.6                 | no            | 0.0               | 0.9       | no            | 0.0               | 0.1       | no       | neg. |
| NIT-8082456   | n/a                  | n/a               | n/a    | n/a           | n/a               | n/a                 | n/a           | n/a               | n/a       | n/a           | n/a               | n/a       | n/a      | n/a  |
| NIT-6468573   | 3.0                  | 3.5               | no     | no            | 0.0               | 1.3                 | no            | 0.0               | 0.8       | no            | 0.0               | 0.2       | n/a      | neg. |
| NIT-8085768   | 3.0                  | 5.9               | yes    | no            | 0.0               | 3.2                 | no            | 0.0               | 1.8       | no            | 0.0               | 0.9       | no       | neg. |
| NIT-5430483   | <2.0                 | 3.3               | no     | no            | 0.0               | 1.5                 | no            | 0.0               | 1.0       | no            | 0.0               | 0.3       | no       | neg. |
| NIT-8088849   | <2.0                 | 3.1               | no     | no            | 0.0               | 1.4                 | no            | 0.0               | 0.7       | no            | 0.0               | 0.1       | no       | n/a  |
| NIT-7328019   | 4.0                  | 5.8               | yes    | no            | 0.0               | 2.4                 | no            | 0.0               | 1.5       | no            | 0.0               | 0.2       | no       | n/a  |
| NIT-7305315   | <2.0                 | 4.2               | no     | no            | 0.0               | 2.1                 | no            | 0.0               | 1.1       | no            | 0.0               | 0.2       | no       | n/a  |
| NIT-6339786   | <2.0                 | 3.7               | no     | no            | 0.0               | 1.6                 | no            | 0.0               | 1.0       | no            | 0.0               | 0.3       | no       | neg. |
| NIT-8074584   | <2.0                 | 6.5               | no     | no            | 0.0               | 2.8                 | no            | 0.0               | 1.4       | no            | 0.0               | 0.2       | no       | n/a  |
| NIT-7068261   | <2.0                 | 2.4               | no     | no            | 0.0               | 1.1                 | no            | 0.0               | 0.5       | no            | 0.0               | 0.2       | no       | neg. |
| NIT-4402605   | <2.0                 | 4.6               | no     | no            | 0.0               | 2.1                 | no            | 0.0               | 1.2       | no            | 0.0               | 0.1       | no       | n/a  |
| NIT-6830004   | <2.0                 | 3.7               | no     | no            | 0.0               | 1.4                 | no            | 0.0               | 0.9       | no            | 0.0               | 0.1       | no       | neg. |
| NIT-8085495   | n/a                  | n/a               | n/a    | n/a           | n/a               | n/a                 | n/a           | n/a               | n/a       | n/a           | n/a               | n/a       | n/a      | n/a  |
| DUS-4293525   | 3.0                  | 4.2               | no     | n/a           | n/a               | 1.9                 | n/a           | n/a               | 1.1       | n/a           | n/a               | 0.2       | no       | neg. |
| DUS-8334942   | <2.0                 | 2.5               | no     | no            | 0.0               | 1.3                 | no            | 0.0               | 0.5       | no            | 0.0               | 0.1       | no       | neg. |

**Supplementary Table S6 - Basic CSF characteristics of Soma patients**

BCSFBD - Blood-CSF-barrier dysfunction, CSF - Cerebrospinal fluid, Ig - Immunoglobulin, MRZ - Antibody indices (AI) against measles, rubella, and varicella zoster virus. MRZ was defined ‘positive’ if at least two out of three AI were higher than 1.5, OCBs - Oligoclonal bands, Soma - Somatic symptom disorder.
