# Supplementary material for: The Use of Nitrosative Stress Molecules as Potential Diagnostic Biomarkers in Multiple Sclerosis
Source: MDPI journal article supplement (doi:10.3390/ijms25020787), 2024-01-08
Supplement: s1 [file s1]

| Pseudonym     | Age | Sex | Previous DMTs | Medication                                                                                                  | Comorbidities                                                                                                                                                          | MRI active lesions | NOx serum (μM) | NOx CSF (μM) |
|---------------|-----|-----|---------------|-------------------------------------------------------------------------------------------------------------|------------------------------------------------------------------------------------------------------------------------------------------------------------------------|--------------------|----------------|--------------|
| NIT-7990854   | 31  | m   | no            | n/a                                                                                                         | Scoliosis, thrombophlebitis                                                                                                                                            | no                 | 3.3            | 1.8          |
| GEN-K-5434398 | 34  | f   | no            | n/a                                                                                                         | n/a                                                                                                                                                                    | n/a                | 5.9            | 4.8          |
| GEN-K-7897038 | 33  | f   | no            | no                                                                                                          | no                                                                                                                                                                     | no                 | 1.6            | n/a          |
| GEN-K-7250304 | 32  | f   | no            | Propranolol, propylthiouracil                                                                               | Graves' disease, platelet dysfunction, s/p splenic vein thrombosis, h/o gastric fundus varices treated with clipping, s/p resection of pancreatic pseudocyst, migraine | no                 | 3.5            | n/a          |
| GEN-K-7895979 | 21  | f   | no            | Levothyroxine                                                                                               | Hypothyroidism, obesity                                                                                                                                                | no                 | 0.5            | 2.9          |
| GEN-K-7901346 | 28  | f   | no            | n/a                                                                                                         | no                                                                                                                                                                     | n/a                | 8.7            | n/a          |
| GEN-K-3717612 | 54  | f   | no            | Amlodipine, ramipril                                                                                        | S/p resection of a papillary urothelial carcinoma, neurodermatitis, hemochromatosis without clinical relevance, aHT                                                    | n/a                | 5.1            | 6.0          |
| NIT-5501313   | 55  | f   | no            | no                                                                                                          | S/p resection of rectal carcinoma, ductal carcinoma in situ of the breast                                                                                              | n/a                | 8.1            | n/a          |
| NIT-7895802   | 29  | f   | no            | Pregabalin, escitalopram                                                                                    | Depression, anxiety disorder                                                                                                                                           | n/a                | 6.0            | n/a          |
| NIT-7799868   | 28  | f   | no            | Hydroxychloroquine                                                                                          | Seronegative polyarthritits and tendonitis                                                                                                                             | n/a                | 8.0            | 4.3          |
| NIT-6673248   | 33  | f   | no            | Levothyroxine                                                                                               | Hereditary coagulation disorder, suspected mild factor XIII deficiency, suspected ACE gene polymorphism, h/o DVT, hypothyroidism, s/p left breast fibroadenoma         | n/a                | 4.1            | n/a          |
| NIT-7818138   | 44  | f   | no            | no                                                                                                          | Suspected NAFLD, endometriosis, type C gastritis, vitamin D deficiency                                                                                                 | n/a                | 1.9            | n/a          |
| NIT-3253011   | 31  | f   | no            | Lamotrigine, perampanel                                                                                     | Epilepsy                                                                                                                                                               | n/a                | 6.0            | n/a          |
| NIT-8003463   | 21  | f   | no            | no                                                                                                          | Gilbert's syndrome                                                                                                                                                     | n/a                | 5.8            | n/a          |
| NIT-6174948   | 28  | f   | no            | no                                                                                                          | H/o varicose vein stripping, scoliosis, pectus excavatum                                                                                                               | n/a                | 3.3            | n/a          |
| NIT-8082456   | 21  | f   | n/a           | n/a                                                                                                         | Right-sided peripheral facial palsy on the right, chronic hiccups                                                                                                      | n/a                | 8.4            | n/a          |
| NIT-6468573   | 42  | f   | no            | no                                                                                                          | no                                                                                                                                                                     | n/a                | 5.3            | 0.3          |
| NIT-8085768   | 23  | f   | no            | Salbutamol                                                                                                  | Suspected C8 root syndrome DD left brachial plexus involvement, asthma                                                                                                 | n/a                | 5.8            | 3.9          |
| NIT-5430483   | 24  | m   | no            | no                                                                                                          | no                                                                                                                                                                     | n/a                | 2.4            | 2.5          |
| NIT-8088849   | 26  | f   | no            | no                                                                                                          | no                                                                                                                                                                     | n/a                | 2.2            | n/a          |
| NIT-7328019   | 25  | m   | no            | no                                                                                                          | no                                                                                                                                                                     | no                 | 3.6            | n/a          |
| NIT-7305315   | 39  | m   | no            | n/a                                                                                                         | n/a                                                                                                                                                                    | n/a                | 3.9            | 4.8          |
| NIT-6339786   | 37  | f   | no            | no                                                                                                          | Latent hypothyroidism                                                                                                                                                  | n/a                | 7.0            | n/a          |
| NIT-8074584   | 51  | f   | no            | Amlodipine, candesartan, levothyroxine, metoprolol, fluticasone furoate-umeclidinium-vilanterol, salbutamol | Depressive episode, h/o lumbar disc herniation, h/o pneumonia with pleural empyema, hypothyroidism, aHT                                                                | n/a                | 8.8            | n/a          |
| NIT-7068261   | 19  | f   | no            | no                                                                                                          | H/o right maxillary (zygomatic) and orbital floor fracture, h/o hyphema in the right eye following a contusion injury                                                  | n/a                | 1.7            | 2.2          |
| NIT-4402605   | 23  | f   | no            | Loratadine                                                                                                  | n/a                                                                                                                                                                    | n/a                | 5.5            | n/a          |
| NIT-6830004   | 52  | f   | no            | Imipramine, enalapril, hydrochlorothiazide, pregabalin                                                      | AHT, depression, antelsthesis of L5 relative to S1, disc-ossification-related neuroforaminal and recessed stenosis, facet joint arthrosis                              | n/a                | 7.0            | n/a          |
| NIT-8085495   | 26  | f   | n/a           | Levothyroxine                                                                                               | Hypothyroidism                                                                                                                                                         | n/a                | 6.0            | n/a          |

| Pseudonym   | Age | Sex | Previous DMTs | Medication | Comorbidities | MRI active lesions | NOx serum (μM) | NOx CSF (μM) |
|-------------|-----|-----|---------------|------------|---------------|--------------------|----------------|--------------|
| DUS-4293525 | 20  | f   | no            | no         | no            | no                 | n/a            | 3.6          |
| DUS-8334942 | 36  | f   | no            | no         | no            | no                 | n/a            | 3.1          |

**Supplementary Table S5 - Basic demographic and clinical data of Soma patients**

ACE - Angiotensin-converting enzyme, AHT - Arterial hypertension, CSF - Cerebrospinal fluid, DD - Differential diagnosis, DMTs - Disease modifying therapies, DVT- Deep vein thrombosis, EDSS - Expanded Disability Status Scale, H/o - History of, NAFLD - Non-alcoholic fatty liver disease, NOx - Nitrite/nitrate, MRI - Magnetic resonance imaging, Soma - Somatic symptom disorder, S/p - Status post.
