# Supplementary material for: The Use of Nitrosative Stress Molecules as Potential Diagnostic Biomarkers in Multiple Sclerosis
Source: MDPI journal article supplement (doi:10.3390/ijms25020787), 2024-01-08
Supplement: s1 [file s1]

[illegible]

| Pseudonym      | CSF leukocytes (/μl) | CSF albumin ratio | BCSFBD | IgG synthesis | IgG synthesis (%) | IgG ratio (x1/1000) | IgA synthesis | IgA synthesis (%) | IgA ratio | IgM synthesis | IgM synthesis (%) | IgM ratio | CSF OCBs | MRZ  |
|----------------|----------------------|-------------------|--------|---------------|-------------------|---------------------|---------------|-------------------|-----------|---------------|-------------------|-----------|----------|------|
| NIT-6782991    | 7.0                  | 9.8               | yes    | yes           | n/a               | 6.3                 | no            | 0.0               | 3.3       | no            | 0.0               | 0.6       | yes      | neg. |
| NIT-8062374    | 8.0                  | 4.3               | yes    | yes           | n/a               | 2.2                 | no            | 0.0               | 1.3       | yes           | 25.0              | 1.1       | yes      | n/a  |
| NIT-8102001    | 5.0                  | 4.7               | no     | yes           | n/a               | 2.7                 | no            | 0.0               | 1.0       | no            | 0.0               | 0.4       | yes      | neg. |
| NIT-8088417    | 3.0                  | 6.4               | no     | no            | 0.0               | 2.9                 | no            | 0.0               | 1.5       | no            | 0.0               | 0.2       | no       | neg. |
| NIT-8136921    | n/a                  | n/a               | n/a    | n/a           | n/a               | n/a                 | n/a           | n/a               | n/a       | n/a           | n/a               | n/a       | yes      | n/a  |
| REB/K2-4917297 | 3.0                  | 3.3               | no     | yes           | n/a               | 2.7                 | n/a           | n/a               | n/a       | n/a           | n/a               | n/a       | yes      | pos. |
| REB/K2-8134920 | 1.0                  | 3.2               | n/a    | yes           | n/a               | 2.6                 | n/a           | n/a               | n/a       | n/a           | n/a               | n/a       | yes      | n/a  |
| NIT-8181639    | 293.0                | 11.0              | yes    | yes           | n/a               | 6.0                 | no            | 0.0               | 4.9       | no            | 0.0               | 3.5       | yes      | n/a  |
| NIT-3403428    | 4.0                  | 5.0               | no     | no            | 0.0               | 2.9                 | no            | 0.0               | 1.4       | no            | 0.0               | 0.5       | no       | neg. |
| NIT-4348821    | 13.0                 | 7.0               | yes    | yes           | n/a               | 4.7                 | no            | 0.0               | 2.2       | no            | 0.0               | 0.5       | yes      | neg. |
| NIT-8087343    | 2.0                  | 2.4               | no     | yes           | n/a               | 1.5                 | no            | 0.0               | 0.5       | no            | 0.0               | 0.1       | yes      | neg. |
| NIT-7172448    | 16.0                 | 5.0               | no     | yes           | 13.0              | 4.0                 | no            | 0.0               | 1.8       | yes           | 83.0              | 4.5       | yes      | neg. |
| NIT-7607967    | 17.0                 | 4.2               | no     | yes           | 51.0              | 5.9                 | yes           | 16.0              | 2.2       | no            | 0.0               | 0.8       | yes      | pos. |
| NIT-6919392    | 10.0                 | 6.3               | no     | yes           | 13.0              | 5.3                 | no            | 0.0               | 1.6       | no            | 0.0               | 0.4       | yes      | pos. |
| NIT-8088474    | 25.0                 | 3.0               | no     | yes           | 61.0              | 4.9                 | yes           | 20.0              | 1.5       | yes           | 35.0              | 0.8       | yes      | pos. |
| NIT-8096613    | n/a                  | n/a               | n/a    | n/a           | n/a               | n/a                 | n/a           | n/a               | n/a       | n/a           | n/a               | n/a       | yes      | n/a  |
| NIT-7459605    | 0.0                  | n/a               | n/a    | n/a           | n/a               | n/a                 | n/a           | n/a               | n/a       | n/a           | n/a               | n/a       | yes      | n/a  |
| NIT-8086905    | 9.0                  | n/a               | n/a    | yes           | 62.2              | n/a                 | yes           | 10.1              | n/a       | yes           | 45.3              | n/a       | yes      | n/a  |
| NIT-8154425    | 6.0                  | 2.1               | no     | no            | 0.0               | 1.5                 | no            | 0.0               | 0.4       | no            | 0.0               | 0.1       | no       | pos. |
| NIT-8163345    | 7.0                  | 4.5               | no     | yes           | 47.1              | 5.9                 | no            | 0.0               | 1.3       | no            | 0.0               | 0.2       | yes      | pos. |
| NIT-8134077    | 6.0                  | 5.8               | yes    | yes           | 30.0              | 5.9                 | no            | 0.0               | 1.6       | no            | 0.0               | 1.4       | yes      | neg. |
| NIT-8166927    | 9.0                  | 4.8               | no     | yes           | 47.0              | 6.2                 | no            | 0.0               | 1.6       | no            | 0.0               | 0.9       | yes      | n/a  |
| NIT-8197809    | 3.0                  | 2.5               | no     | yes           | n/a               | 1.7                 | no            | 0.0               | 0.6       | no            | 0.0               | 0.4       | yes      | neg. |
| DUS-5332299    | 0.0                  | 4.6               | no     | no            | 0.0               | 2.3                 | no            | 0.0               | 1.3       | no            | 0.0               | 0.2       | no       | n/a  |
| DUS-8189904    | 14.0                 | 2.6               | no     | yes           | n/a               | 6.2                 | n/a           | n/a               | n/a       | n/a           | n/a               | n/a       | yes      | n/a  |
| DUS-8213607    | 5.0                  | 5.2               | no     | yes           | 0.3               | 3.7                 | n/a           | n/a               | n/a       | n/a           | n/a               | 0.2       | yes      | pos. |
| DUS-8197194    | 70.0                 | 7.8               | yes    | yes           | n/a               | 4.9                 | n/a           | n/a               | 2.7       | n/a           | n/a               | 0.6       | yes      | neg. |
| DUS-8176917    | 11.0                 | 8.3               | yes    | yes           | n/a               | n/a                 | n/a           | n/a               | n/a       | n/a           | n/a               | 2.1       | yes      | pos. |
| DUS-8288859    | 10.0                 | 7.8               | yes    | yes           | n/a               | 5.2                 | no            | 0.0               | 2.6       | no            | 0.0               | 0.6       | yes      | neg. |
| NIT-8048556    | 2.0                  | 6.5               | no     | no            | 0.0               | 2.8                 | no            | 0.0               | 1.8       | no            | 0.0               | 0.2       | no       | neg. |
| NFL/R-7853181  | 14.0                 | 6.8               | yes    | yes           | 50.0              | 9.9                 | no            | 0.0               | 1.6       | no            | 0.0               | 0.4       | yes      | pos. |
| NFL/R-7870851  | 16.0                 | 10.3              | yes    | yes           | n/a               | 8.8                 | no            | 0.0               | 3.9       | no            | 0.0               | 1.2       | yes      | n/a  |
| NFL/R-7863336  | 0.0                  | 5.1               | no     | yes           | n/a               | 3.8                 | no            | 0.0               | 1.5       | no            | 0.0               | 0.6       | yes      | neg. |
| DUS-6586830    | 3.0                  | 7.6               | yes    | yes           | n/a               | 4.8                 | no            | 0.0               | 2.3       | no            | 0.0               | 0.6       | yes      | n/a  |
| DUS-6224907    | 6.0                  | 8.1               | yes    | yes           | n/a               | 5.0                 | yes           | 23.0              | 5.4       | no            | 0.0               | 1.9       | yes      | n/a  |

**Supplementary Table S2 - Basic CSF characteristics of RRMS patients**

BCSFBD - Blood-CSF-barrier dysfunction, CSF - Cerebrospinal fluid, Ig - Immunoglobulin, MRZ - Antibody indices (AI) against measles, rubella, and varicella zoster virus. MRZ was defined 'positive' if at least two out of three AI were higher than 1.5, n/a - not available, OCBs - Oligoclonal bands, RRMS - Relapsing remitting Multiple Sclerosis.
