# Supplementary material for: The Use of Nitrosative Stress Molecules as Potential Diagnostic Biomarkers in Multiple Sclerosis
Source: MDPI journal article supplement (doi:10.3390/ijms25020787), 2024-01-08
Supplement: s1 [file s1]

| Pseudonym      | Age | Sex | Duration since 1. symp. (Y) | Duration since 1. diagnosis (Y) | Previous DMTs | Medication                      | Comorbidities                                                                                                                                                       | Relapse | EDSS | MRI active lesions | NOx serum (μM) | NOx CSF (μM) |
|----------------|-----|-----|-----------------------------|---------------------------------|---------------|---------------------------------|---------------------------------------------------------------------------------------------------------------------------------------------------------------------|---------|------|--------------------|----------------|--------------|
| NIT-7984596    | 41  | f   | 18.6                        | 18.5                            | no            | no                              | Vitiligo                                                                                                                                                            | no      | 1.0  | n/a                | 4.1            | n/a          |
| NIT-7936476    | 44  | f   | 3.6                         | 3.5                             | no            | no                              | n/a                                                                                                                                                                 | no      | 0.0  | no                 | 0.7            | n/a          |
| NIT-7968645    | 32  | f   | 0.9                         | 0.0                             | no            | no                              | Migraine with aura, lipedema, obesity                                                                                                                               | no      | 1.0  | no                 | 3.4            | 2.7          |
| NIT-7942539    | 57  | f   | 1.6                         | 0.0                             | no            | Valsartan                       | S/p TEP of the left knee, s/p spinal surgery for L4/5 prolapse, s/p cholecystectomy, eutyhreotic goiter, s/p removal of a giant cell tumor of the right digitus III | yes     | 1.0  | no                 | 4.9            | 3.5          |
| NIT-6047403    | 52  | f   | 0.1                         | 0.0                             | no            | no                              | Chronic lacunar defect in the posterior limb of the left internal capsule DD Virchow-Robin space                                                                    | yes     | 2.0  | yes                | 6.5            | n/a          |
| GEN-K-7888842  | 57  | m   | 0.1                         | 0.6                             | no            | Vitamin D                       | AHT                                                                                                                                                                 | no      | 0.0  | yes                | 9.8            | 3.3          |
| NIT-7936341    | 53  | m   | 4.2                         | 0.3                             | no            | Vitamin D                       | Subclavian stenosis, vitamin D deficiency, right adrenal adenoma, hypercholesterolemia                                                                              | no      | 6.0  | no                 | 18.4           | n/a          |
| NIT-3276531    | 38  | f   | 0.0                         | 0.0                             | no            | Ramipril, amlodipine, vitamin D | Lipedema, aHT, pineal cyst DD pineocytoma, chronic bronchitis, asthma                                                                                               | yes     | 2.5  | yes                | 11.9           | 4.3          |
| NIT-7990398    | 24  | f   | 0.2                         | 0.2                             | no            | no                              | no                                                                                                                                                                  | no      | 1.0  | yes                | 10.5           | n/a          |
| NIT-7968168    | 54  | m   | 0.7                         | 0.3                             | no            | Vitamin D, sertraline           | Cataract, COPD, axonal peripheral neuropathy, aHT, s/p bladder cancer in 2018, anxiety disorder                                                                     | no      | 2.5  | n/a                | 35.2           | n/a          |
| NIT-7993617    | 37  | f   | 0.7                         | 0.3                             | no            | no                              | Neurodermatitis, aHT, hyperlipoproteinemia                                                                                                                          | no      | 2.5  | no                 | 15.1           | n/a          |
| NIT-7985475    | 39  | m   | 1.7                         | 0.0                             | no            | no                              | Depressive adjustment disorder                                                                                                                                      | yes     | 5.0  | yes                | 1.5            | n/a          |
| REB/K1-6670439 | 23  | f   | 0.8                         | 0.6                             | no            | Levetiracetam                   | Symptomatic epilepsy                                                                                                                                                | no      | 2.0  | n/a                | 2.2            | n/a          |
| NIT-7999590    | 34  | m   | 0.3                         | 0.2                             | no            | no                              | Polyneuropathy                                                                                                                                                      | no      | n/a  | yes                | 1.4            | n/a          |
| NIT-7588734    | 31  | f   | 2.7                         | 2.7                             | no            | no                              | Hypothyroidism                                                                                                                                                      | no      | 1.0  | n/a                | 3.7            | n/a          |
| NIT-4311195    | 57  | f   | 18.8                        | 0.0                             | no            | no                              | Disc herniation                                                                                                                                                     | no      | 2.0  | yes                | 4.7            | n/a          |
| NIT-7689525    | 39  | f   | 0.7                         | 0.1                             | no            | no                              | Depression and anxiety disorder                                                                                                                                     | no      | 2.0  | yes                | 3.5            | n/a          |
| NIT-6567357    | 57  | f   | 1.8                         | 0.0                             | no            | Fampridine                      | S/p resection of a bladder carcinoma, hypercholesterolemia                                                                                                          | no      | 2.0  | n/a                | 9.2            | n/a          |
| NIT-7909971    | 49  | f   | 1.1                         | 0.1                             | no            | no                              | Latent tuberculosis                                                                                                                                                 | no      | 2.0  | yes                | 3.9            | n/a          |
| NIT-5950698    | 36  | m   | 0.6                         | 0.2                             | no            | no                              | Alcohol use disorder, hip osteoarthritis, h/o epileptic seizure during alcohol withdrawal, steatosis hepatis and pancreatic lipomatosis, coxarthrosis               | no      | 2.5  | no                 | 0.9            | n/a          |
| NIT-7958373    | 34  | f   | 1.3                         | 0.3                             | no            | no                              | H/o disc herniation                                                                                                                                                 | no      | 2.0  | no                 | 11.1           | 3.7          |
| NIT-8058216    | 28  | f   | 0.5                         | 0.4                             | no            | Folate                          | no                                                                                                                                                                  | no      | 0.0  | n/a                | 1.9            | n/a          |
| NIT-8041314    | 55  | f   | 0.8                         | 0.5                             | no            | no                              | Asthma, aHT, disc herniation, h/o breast surgery, polyneuropathy                                                                                                    | no      | 2.5  | n/a                | 20.0           | n/a          |
| NIT-8072967    | 40  | f   | 0.3                         | 0.1                             | no            | no                              | H/o surgery for massive disc herniation with cauda equina syndrome, post-traumatic stress disorder and anxiety disorder                                             | yes     | 3.0  | no                 | 8.7            | n/a          |
| NIT-5579934    | 38  | f   | 0.7                         | 0.2                             | no            | no                              | H/o infectious mononucleosis                                                                                                                                        | no      | 1.5  | no                 | 12.0           | n/a          |

| Pseudonym      | Age | Sex | Duration since 1. symp. (Y) | Duration since 1. diagnosis (Y) | Previous DMTs | Medication                                                                                                 | Comorbidities                                                                                                                                                                                 | Relapse | EDSS | MRI active lesions | NOx serum (μM) | NOx CSF (μM) |
|----------------|-----|-----|-----------------------------|---------------------------------|---------------|------------------------------------------------------------------------------------------------------------|-----------------------------------------------------------------------------------------------------------------------------------------------------------------------------------------------|---------|------|--------------------|----------------|--------------|
| NIT-8075595    | 29  | f   | 0.3                         | 0.1                             | no            | n/a                                                                                                        | Migraine                                                                                                                                                                                      | no      | 2.0  | yes                | 28.2           | n/a          |
| NIT-8063169    | 29  | m   | 0.1                         | 0.0                             | no            | no                                                                                                         | H/o syphilis, vitamin D deficiency                                                                                                                                                            | yes     | 0.0  | yes                | 26.7           | n/a          |
| NIT-7846668    | 36  | f   | 0.0                         | 0.0                             | no            | no                                                                                                         | Arachnoid cyst, epilepsy                                                                                                                                                                      | no      | n/a  | n/a                | 7.2            | n/a          |
| NIT-8087889    | 33  | f   | 0.0                         | 0.0                             | no            | no                                                                                                         | n/a                                                                                                                                                                                           | yes     | 1.0  | yes                | 41.1           | n/a          |
| NIT-4507026    | 57  | m   | 0.6                         | 0.0                             | no            | Metoprolol, valsartan, metformin                                                                           | Bilateral blindness due to ischemic diabetic maculopathy, h/o biliary pancreatitis and subsequent cholangitis due to choledocholithiasis associated with cholecystolithiasis, DM type II, PAD | yes     | 6.5  | yes                | 23.2           | 10.6         |
| NIT-8068254    | 35  | m   | 1.1                         | 0.0                             | no            | no                                                                                                         | no                                                                                                                                                                                            | no      | 0.0  | n/a                | 8.6            | 4.1          |
| NIT-8107689    | 35  | f   | 0.1                         | 0.0                             | no            | no                                                                                                         | S/p bilateral carpal tunnel syndrome                                                                                                                                                          | yes     | 2.0  | no                 | 2.3            | 2.9          |
| NIT-7965198    | 25  | f   | 6.1                         | 0.0                             | no            | Levothyroxine, folate                                                                                      | Migraine, hypothyroidism                                                                                                                                                                      | no      | 2.0  | n/a                | 3.4            | n/a          |
| NIT-3030561    | 57  | f   | 9.7                         | 0.0                             | no            | no                                                                                                         | Subclinical hypothyroidism, s/p hallux surgery, reflux disease, s/p ovarian cyst surgery                                                                                                      | no      | 2.5  | no                 | 9.0            | n/a          |
| NIT-6217371    | 39  | f   | 19.7                        | 19.6                            | no            | no                                                                                                         | n/a                                                                                                                                                                                           | no      | 1.0  | n/a                | 16.9           | n/a          |
| NIT-8092548    | 53  | m   | 4.6                         | 0.2                             | no            | Gabapentin                                                                                                 | Cushing's syndrome, obesity, h/o herpes zoster infection, h/o resection of pituitary adenoma                                                                                                  | yes     | 2.0  | no                 | 3.1            | n/a          |
| NIT-6782991    | 53  | m   | 0.9                         | 0.0                             | no            | Vitamin D, ramipril, hydrochlorothiazide, oxycodone, allopurinol, propionic acid, torasemide, pantoprazole | H/o radiculopathy, spondylarthrosis, h/o PTAs, suspected lymphedema, obesity, aHT, hyperuricemia, sleep apnea (CPAP therapy)                                                                  | no      | 2.5  | n/a                | 24.8           | 7.2          |
| NIT-8062374    | 25  | m   | 0.4                         | 0.0                             | no            | n/a                                                                                                        | no                                                                                                                                                                                            | no      | 0.0  | no                 | 4.3            | 1.9          |
| NIT-8102001    | 20  | f   | 2.1                         | 0.1                             | no            | no                                                                                                         | no                                                                                                                                                                                            | yes     | 1.0  | yes                | 7.9            | 4.3          |
| NIT-8088417    | 41  | f   | 0.2                         | 0.0                             | no            | n/a                                                                                                        | H/o right-sided iritis                                                                                                                                                                        | yes     | n/a  | yes                | 5.0            | 4.4          |
| NIT-8136921    | 22  | f   | 0.3                         | 0.2                             | no            | no                                                                                                         | no                                                                                                                                                                                            | no      | 1.0  | yes                | 16.6           | n/a          |
| REB/K2-4917297 | 45  | f   | 3.4                         | 0.2                             | no            | n/a                                                                                                        | Hypothyroidism, hypercholesterolemia, migraine with aura, h/o bursitis, glaucoma                                                                                                              | no      | 3.5  | n/a                | 10.9           | n/a          |
| REB/K2-8134920 | 36  | f   | 6.4                         | 0.2                             | no            | no                                                                                                         | H/o gestational diabetes, chronic sinusitis                                                                                                                                                   | no      | 1.0  | no                 | 4.4            | n/a          |
| NIT-8181639    | 30  | m   | 0.3                         | 0.2                             | no            | no                                                                                                         | no                                                                                                                                                                                            | no      | 2.0  | yes                | 4.7            | n/a          |
| NIT-3403428    | 30  | m   | 0.5                         | 0.2                             | no            | n/a                                                                                                        | Hypothyroidism                                                                                                                                                                                | no      | 1.0  | no                 | 12.3           | n/a          |
| NIT-4348821    | 24  | m   | 0.2                         | 0.0                             | no            | Vitamin B12                                                                                                | Vitamin D deficiency, Vitamin B12 deficiency                                                                                                                                                  | yes     | 2.0  | yes                | 12.2           | 4.3          |
| NIT-8087343    | 47  | f   | 0.1                         | 0.1                             | no            | n/a                                                                                                        | H/o vestibular neuritis, depression, hypothyroidism, cholecystectomy, h/o melanoma                                                                                                            | yes     | 1.0  | n/a                | 0.4            | n/a          |
| NIT-7172448    | 20  | m   | 0.7                         | 0.0                             | no            | no                                                                                                         | Recurrent nephrotic syndrome                                                                                                                                                                  | yes     | 2.0  | yes                | 7.6            | 6.0          |
| NIT-7607967    | 20  | m   | 0.1                         | 0.0                             | no            | no                                                                                                         | no                                                                                                                                                                                            | yes     | 0.0  | yes                | 4.0            | n/a          |

| Pseudonym     | Age | Sex | Duration since 1. symp. (Y) | Duration since 1. diagnosis (Y) | Previous DMTs | Medication                                                                             | Comorbidities                                                                                                                                                                                                                                                                                                                                                                                                                            | Relapse | EDSS | MRI active lesions | NOx serum (μM) | NOx CSF (μM) |
|---------------|-----|-----|-----------------------------|---------------------------------|---------------|----------------------------------------------------------------------------------------|------------------------------------------------------------------------------------------------------------------------------------------------------------------------------------------------------------------------------------------------------------------------------------------------------------------------------------------------------------------------------------------------------------------------------------------|---------|------|--------------------|----------------|--------------|
| NIT-6919392   | 54  | f   | 1.3                         | 0.0                             | no            | Dapagliflozin ,<br>levothyroxine,<br>valsartan, amlodipine,<br>mirtazapine, liraglutid | Bipolar affective disorder, aHT, DM type II,<br>hypothyroidism, dyslipidemia, suspected<br>microadenoma of the pituitary gland, polyneuropathy,<br>h/o malignant melanoma, h/o surgical treatment for a<br>pilonidal abscess, h/o hysterectomy, bilateral finger<br>polyarthrosis, muscular cervical spine syndrome, hallux<br>valgus, chronic left ankle instability, bilateral<br>metatarsalgia, bilateral high-frequency hearing loss | yes     | n/a  | no                 | 10.5           | 2.7          |
| NIT-8088474   | 31  | f   | 3.3                         | 3.3                             | no            | n/a                                                                                    | VES, h/o two benign breast tumors                                                                                                                                                                                                                                                                                                                                                                                                        | yes     | 3.0  | n/a                | n/a            | 6.1          |
| NIT-8096613   | 34  | f   | 5.1                         | 5.1                             | no            | contraception                                                                          | Microprolactinoma, h/o eating disorders                                                                                                                                                                                                                                                                                                                                                                                                  | no      |      | no                 | 6.0            | n/a          |
| NIT-7459605   | 28  | m   | 0.8                         | 0.3                             | no            | n/a                                                                                    | H/o ossifying fibroma                                                                                                                                                                                                                                                                                                                                                                                                                    | no      | 1.0  | n/a                | 6.2            | n/a          |
| NIT-8086905   | 22  | f   | 0.4                         | 0.3                             | no            | no                                                                                     | Vitamin D deficiency and endometriosis                                                                                                                                                                                                                                                                                                                                                                                                   | yes     | 2.0  | no                 | 2.0            | n/a          |
| NIT-8154425   | 37  | f   | 0.7                         | 0.6                             | no            | Vitamin D                                                                              | no                                                                                                                                                                                                                                                                                                                                                                                                                                       | no      | 0.0  | n/a                | 3.5            | n/a          |
| NIT-8163345   | 46  | f   | 0.4                         | 0.3                             | no            | n/a                                                                                    | Hashimoto thyroiditis                                                                                                                                                                                                                                                                                                                                                                                                                    | no      | 1.0  | n/a                | 23.4           | n/a          |
| NIT-8134077   | 22  | m   | 2.5                         | 0.1                             | no            | n/a                                                                                    | Vitamin D deficiency                                                                                                                                                                                                                                                                                                                                                                                                                     | no      | 1.0  | yes                | 11.2           | n/a          |
| NIT-8166927   | 45  | f   | 0.2                         | 0.0                             | no            | n/a                                                                                    | Vitamin D deficiency                                                                                                                                                                                                                                                                                                                                                                                                                     | yes     | n/a  | yes                | 12.9           | 5.1          |
| NIT-8197809   | 50  | f   | 0.3                         | 0.0                             | no            | no                                                                                     | H/o Lyme disease                                                                                                                                                                                                                                                                                                                                                                                                                         | yes     | n/a  | no                 | 2.1            | 4.6          |
| DUS-5332299   | 44  | f   | 0.0                         | 0.0                             | no            | no                                                                                     | no                                                                                                                                                                                                                                                                                                                                                                                                                                       | yes     | 1.0  | yes                | 13.5           | 3.5          |
| DUS-8189904   | 19  | f   | 0.4                         | 0.4                             | no            | no                                                                                     | H/o miscarriage                                                                                                                                                                                                                                                                                                                                                                                                                          | no      | 1.0  | n/a                | 2.8            | n/a          |
| DUS-8213607   | 29  | f   | 0.8                         | 0.7                             | no            | no                                                                                     | Asthma, scoliosis                                                                                                                                                                                                                                                                                                                                                                                                                        | no      | 0.0  | no                 | 29.4           | n/a          |
| DUS-8197194   | 20  | m   | 1.6                         | 2.1                             | no            | no                                                                                     | no                                                                                                                                                                                                                                                                                                                                                                                                                                       | no      | 0.0  | n/a                | 9.9            | n/a          |
| DUS-8176917   | 57  | f   | 4.6                         | 0.0                             | no            | no                                                                                     | Hashimoto thyroiditis, migraine, aHT                                                                                                                                                                                                                                                                                                                                                                                                     | no      | 2.5  | n/a                | 16.6           | n/a          |
| DUS-8288859   | 30  | f   | 0.1                         | 0.0                             | no            | no                                                                                     | no                                                                                                                                                                                                                                                                                                                                                                                                                                       | yes     | 2.0  | no                 | n/a            | 5.6          |
| NIT-8048556   | 46  | f   | 12.7                        | 0.0                             | no            | Valsartan                                                                              | H/o herpes zoster, MCA aneurysm, aHT                                                                                                                                                                                                                                                                                                                                                                                                     | no      | n/a  | no                 | n/a            | 3.0          |
| NFL/R-7853181 | 41  | m   | 0.1                         | 0.0                             | no            | no                                                                                     | no                                                                                                                                                                                                                                                                                                                                                                                                                                       | yes     | 0.0  | yes                | n/a            | 2.4          |
| NFL/R-7870851 | 24  | f   | 0.1                         | 0.0                             | no            | no                                                                                     | Vitamin D deficiency                                                                                                                                                                                                                                                                                                                                                                                                                     | yes     | 1.0  | yes                | n/a            | 1.9          |
| NFL/R-7863336 | 36  | f   | 0.9                         | 0.0                             | no            | no                                                                                     | no                                                                                                                                                                                                                                                                                                                                                                                                                                       | yes     | 0.0  | yes                | n/a            | 2.3          |
| DUS-6586830   | 20  | m   | 0.1                         | 0.0                             | no            | no                                                                                     | no                                                                                                                                                                                                                                                                                                                                                                                                                                       | yes     | 1.0  | yes                | n/a            | 4.1          |
| DUS-6224907   | 30  | m   | 0.1                         | 0.0                             | no            | no                                                                                     | H/o traumatic brain injury                                                                                                                                                                                                                                                                                                                                                                                                               | yes     | n/a  | yes                | n/a            | 3.5          |

#### Supplementary Table S1 - Basic demographic and clinical data of RRMS patients

aHT - Arterial hypertension, CSF - Cerebrospinal fluid, COPD - Chronic obstructive pulmonary disease, DD - Differential diagnosis, DM - Diabetes mellitus, DMTs - Disease modifying therapies, EDSS - Expanded Disability Status Scale, H/o - History of, MCA - Middle cerebral artery, MRI - Magnetic resonance imaging, n/a - Not available, NOx - Nitrite/nitrate, PAD: peripheral arterial disease, PTA - Percutaneous transluminal angioplasty, RRMS - Relapsing remitting Multiple Sclerosis, Symp. - Symptoms, TEP - Total Endoprosthesis, VES - Ventricular extrasystoles, Y - Years.
