# Supplementary material for: The Use of Nitrosative Stress Molecules as Potential Diagnostic Biomarkers in Multiple Sclerosis
Source: MDPI journal article supplement (doi:10.3390/ijms25020787), 2024-01-08
Supplement: s1 [file s1]

| Pseudonym   | Age | Sex | Duration since 1. symp. (Y) | Duration since first diagnosis (Y) | Previous DMTs | Medication                                  | Comorbidities                                                                                                                                                                                                                                            | EDSS | MRI active lesions | NOx serum (μM) | NOx CSF (μM) |
|-------------|-----|-----|-----------------------------|------------------------------------|---------------|---------------------------------------------|----------------------------------------------------------------------------------------------------------------------------------------------------------------------------------------------------------------------------------------------------------|------|--------------------|----------------|--------------|
| NIT-4536210 | 53  | f   | 1.8                         | 0.0                                | no            | Vitamin D, vitamin B12                      | no                                                                                                                                                                                                                                                       | 2.0  | n/a                | 14.8           | n/a          |
| NIT-7984599 | 52  | m   | 2.8                         | 0.8                                | no            | Magnesium                                   | no                                                                                                                                                                                                                                                       | 2.0  | n/a                | 11.2           | n/a          |
| NIT-8018763 | 43  | m   | 15.8                        | 0.2                                | no            | Baclofen                                    | no                                                                                                                                                                                                                                                       | 4.5  | no                 | 7.0            | n/a          |
| NIT-4823409 | 57  | m   | 26.9                        | 1.8                                | no            | Fampridine, vitamin D, sertraline           | H/o depressive episode                                                                                                                                                                                                                                   | 6.0  | n/a                | 5.3            | n/a          |
| NIT-8058600 | 52  | f   | 3.9                         | 0.5                                | no            | no                                          | Sacroiliac joint arthritis/facet joint arthrosis                                                                                                                                                                                                         | 2.0  | no                 | 4.6            | n/a          |
| NIT-8054499 | 53  | m   | 7.9                         | 0.0                                | no            | no                                          | AHT, reflux esophagitis, spinal canal stenosis                                                                                                                                                                                                           | 1.0  | no                 | 6.6            | n/a          |
| NIT-8072688 | 50  | f   | 5.9                         | 0.0                                | no            | Pregabalin                                  | H/o sepsis, cholecysto-/choledocholithiasis with biliary pancreatitis, s/p cholecystectomy, s/p endoscopic mucosal resection of papillary adenoma, h/o left pelvic vein thrombosis, FAP, s/p laparoscopic proctocolectomy with ileo-anal pouch procedure | 4.0  | n/a                | 4.3            | n/a          |
| NIT-5107428 | 53  | m   | 6.1                         | 0.0                                | no            | Rosuvastatin                                | Vitamin D deficiency, migraine with aura, h/o mitral valve reconstruction, paroxysmal atrial fibrillation, h/o polypectomy for suspicious inflammatory lesions                                                                                           | n/a  | n/a                | 17.9           | 8.0          |
| NIT-8077458 | 49  | m   | 5.6                         | 5.6                                | no            | n/a                                         | H/o alcohol use disorder and cannabis consumption                                                                                                                                                                                                        | 6.0  | n/a                | 13.6           | n/a          |
| NIT-8145630 | 55  | f   | n/a                         | 6.3                                | no            | no                                          | Amblyopia of left eye, h/o hysterectomy                                                                                                                                                                                                                  | 2.0  | no                 | 5.9            | n/a          |
| NIT-8148987 | 44  | m   | 1.2                         | 0.2                                | no            | no                                          | n/a                                                                                                                                                                                                                                                      | 4.5  | n/a                | 5.9            | n/a          |
| NIT-8150661 | 54  | f   | 27.4                        | 0.3                                | no            | no                                          | n/a                                                                                                                                                                                                                                                      | 3.0  | n/a                | 7.4            | n/a          |
| NIT-5743011 | 43  | f   | 4.8                         | 0.1                                | no            | no                                          | Thumb saddle joint arthrosis                                                                                                                                                                                                                             | 0.0  | no                 | 8.3            | n/a          |
| NIT-8194743 | 58  | m   | 2.7                         | 0.6                                | no            | Vitamin B and D, magnesium                  | Small fiber neuropathy                                                                                                                                                                                                                                   | 1.0  | no                 | 11.3           | n/a          |
| NIT-5124471 | 52  | f   | 1.0                         | 0.5                                | no            | n/a                                         | H/o hysterectomy, Vitamin D deficiency                                                                                                                                                                                                                   | 2.0  | n/a                | 5.4            | n/a          |
| NIT-3077478 | 70  | m   | 4.6                         | 0.3                                | no            | Aspirine, bisoprolol, ramipril, simvastatin | S/p myocardial infarction, CAD, aHT, macroangiopathy of the internal carotid arteries, degenerative spine changes, neuroforaminal stenoses, left kidney cysts, hypercholesterolemia, vitamin B12 deficiency, s/p melanoma, s/p cataract surgery          | 6.0  | n/a                | 19.9           | n/a          |

**Supplementary Table S3 - Basic demographic and clinical data of PPMS patients**

AHT - Arterial hypertension, CAD - Coronary artery disease, CSF - Cerebrospinal fluid, DMTs - Disease modifying therapies, EDSS - Expanded Disability Status Scale, FAP - Familial Adenomatous Polyposis, PPMS - Primary progressive Multiple Sclerosis, NOx - Nitrite/nitrate, MRI - Magnetic resonance imaging, Symp. - Symptoms, Y - Years.
