# Supplementary material for: The Use of Nitrosative Stress Molecules as Potential Diagnostic Biomarkers in Multiple Sclerosis
Source: MDPI journal article supplement (doi:10.3390/ijms25020787), 2024-01-08
Supplement: s1 [file s1]

| Pseudonym   | CSF leukocytes (/μl) | CSF albumin ratio | BCSFBD | IgG synthesis | IgG synthesis (%) | IgG ratio (x1/1000) | IgA synthesis | IgA synthesis (%) | IgA ratio | IgM synthesis | IgM synthesis (%) | IgM ratio | CSF OCBs | MRZ  |
|-------------|----------------------|-------------------|--------|---------------|-------------------|---------------------|---------------|-------------------|-----------|---------------|-------------------|-----------|----------|------|
| NIT-4536210 | n/a                  | n/a               | n/a    | yes           | n/a               | n/a                 | n/a           | n/a               | n/a       | n/a           | n/a               | n/a       | yes      | pos. |
| NIT-7984599 | 33.0                 | 7.9               | yes    | yes           | n/a               | n/a                 | n/a           | n/a               | n/a       | n/a           | n/a               | n/a       | yes      | n/a  |
| NIT-8018763 | 25.0                 | 15.0              | yes    | yes           | n/a               | n/a                 | n/a           | n/a               | n/a       | n/a           | n/a               | n/a       | yes      | pos. |
| NIT-4823409 | n/a                  | n/a               | n/a    | n/a           | n/a               | n/a                 | n/a           | n/a               | n/a       | n/a           | n/a               | n/a       | n/a      | n/a  |
| NIT-8058600 | 5.0                  | 5.1               | no     | yes           | 46.2              | 6,7                 | no            | 0.0               | 1.3       | no            | 0.0               | 0.6       | yes      | n/a  |
| NIT-8054499 | 1.0                  | 6.3               | n/a    | yes           | n/a               | 4.4                 | n/a           | n/a               | 1.7       | n/a           | n/a               | 0.8       | yes      | n/a  |
| NIT-8072688 | 4.0                  | 4.3               | n/a    | yes           | n/a               | 2.9                 | n/a           | n/a               | 1.1       | n/a           | n/a               | 0.2       | yes      | pos. |
| NIT-5107428 | 22.0                 | 11.0              | yes    | yes           | 56.0              | 20.3                | no            | 0.0               | 3.2       | no            | 0.0               | 2.3       | yes      | pos. |
| NIT-8077458 | n/a                  | n/a               | n/a    | n/a           | n/a               | n/a                 | n/a           | n/a               | n/a       | n/a           | n/a               | n/a       | n/a      | n/a  |
| NIT-8145630 | 3.0                  | 3.9               | no     | yes           | 21.7              | 3.3                 | no            | 0.0               | 1.1       | no            | 0.0               | 0.2       | yes      | pos. |
| NIT-8148987 | 10.0                 | n/a               | no     | yes           | n/a               | 11.0                | n/a           | n/a               | 1.7       | yes           | n/a               | 2.1       | yes      | n/a  |
| NIT-8150661 | 9.0                  | 12.0              | yes    | no            | 0.0               | n/a                 | n/a           | n/a               | n/a       | n/a           | n/a               | n/a       | no       | neg. |
| NIT-5743011 | 5.0                  | 5.3               | no     | yes           | n/a               | 3.6                 | n/a           | n/a               | 1.8       | n/a           | n/a               | 0.6       | yes      | neg. |
| NIT-8194743 | 1.7                  | 6.7               | n/a    | yes           | n/a               | 4.7                 | n/a           | n/a               | 2.0       | n/a           | n/a               | 1.0       | yes      | n/a  |
| NIT-5124471 | 4.0                  | 15.3              | yes    | yes           | n/a               | 12.0                | n/a           | n/a               | n/a       | n/a           | n/a               | n/a       | yes      | neg. |
| NIT-3077478 | 25.0                 | 8.8               | n/a    | yes           | 0.0               | 4.4                 | no            | 0.0               | 2.0       | no            | 0.0               | 0.3       | yes      | neg. |

**Supplementary Table S4 - Basic CSF characteristics of PPMS patients**

BCSFBD - Blood-CSF-barrier dysfunction, CSF - Cerebrospinal fluid, Ig - Immunoglobulin, MRZ - Antibody indices (AI) against measles, rubella, and varicella zoster virus. MRZ was defined ‘positive’ if at least two out of three AI were higher than 1.5, OCBs - Oligoclonal bands, PPMS - Primary progressive Multiple Sclerosis.
